# Supplementary material
Source: PubMed Central journal article supplement (PMC7735661)
Supplement: NIHMS1649565-supplement-online_suppl.pdf [file NIHMS1649565-supplement-online_suppl.pdf]

## **SUPPLEMENTAL MATERIAL**

### **Supplemental Figure 1. Study design to analyze associations between acute exacerbation of chronic obstructive pulmonary disease and atrial fibrillation-related emergency department visits or hospitalizations**

Visualized presentation of the present study design to analyze the association between AECOPD hospitalization and AF-related emergency department visits or hospitalization by using the self-controlled case series method.

The RR was calculated by comparing the rate in the reference period (i.e., pre-AECOPD days 1 to 90) with that in the subsequent four 90-day periods (i.e., post-AECOPD days 1 to 90, 91 to 180, 181 to 270, and 271 to 360).

### **Supplemental Table 1. Rate ratios of emergency department visit or hospitalization for atrial fibrillation in patients hospitalized for acute exacerbation of chronic obstructive pulmonary disease, stratified by age**

### **Supplemental Table 2. Rate ratios of emergency department visit or hospitalization for atrial fibrillation in patients hospitalized for acute exacerbation of chronic obstructive pulmonary disease, stratified by sex**

### **Supplemental Table 3. Rate ratios of emergency department visit or hospitalization for atrial fibrillation in patients hospitalized for acute exacerbation of chronic obstructive pulmonary disease, stratified by presence of atrial fibrillation at the index hospitalization**

**Supplemental Table 4. Rate ratios of emergency department visit or hospitalization for atrial fibrillation in patients hospitalized for acute exacerbation of chronic obstructive pulmonary disease, stratified by season of index hospitalization**

**Supplemental Table 5. Rate ratios of emergency department visit or hospitalization for atrial fibrillation in patients hospitalized for acute exacerbation of chronic obstructive pulmonary disease, including those with primary diagnosis of heart failure and secondary diagnosis of atrial fibrillation (n=1,062)**

**Supplemental Table 6. Rate ratios of emergency department visit or hospitalization for atrial fibrillation in patients hospitalized for acute exacerbation of chronic obstructive pulmonary disease (AECOPD), excluding those who had emergency department visit for AECOPD within 90 days preceding hospitalization (n=936)**

**Supplemental Table 7. Rate ratios of emergency department visit or hospitalization for atrial fibrillation in patients hospitalized for acute exacerbation of chronic obstructive pulmonary disease, including those with multiple hospitalizations for acute exacerbation of chronic obstructive pulmonary disease during the follow-up period (n=1,547)**

**Supplemental Table 8. Rate ratios of emergency department visit or hospitalization for atrial fibrillation in patients hospitalized for acute exacerbation of chronic obstructive pulmonary disease among those who are known to live at least 360 days after index hospitalization (n=602)**

**Supplemental Table 9. Odds ratios of emergency department visit or hospitalization for atrial fibrillation in patients hospitalized for acute exacerbation of chronic obstructive pulmonary disease (n=944)**

**Supplemental Figure 1. Study design to analyze associations between acute exacerbation of chronic obstructive pulmonary disease and atrial fibrillation-related emergency department visits or hospitalizations**

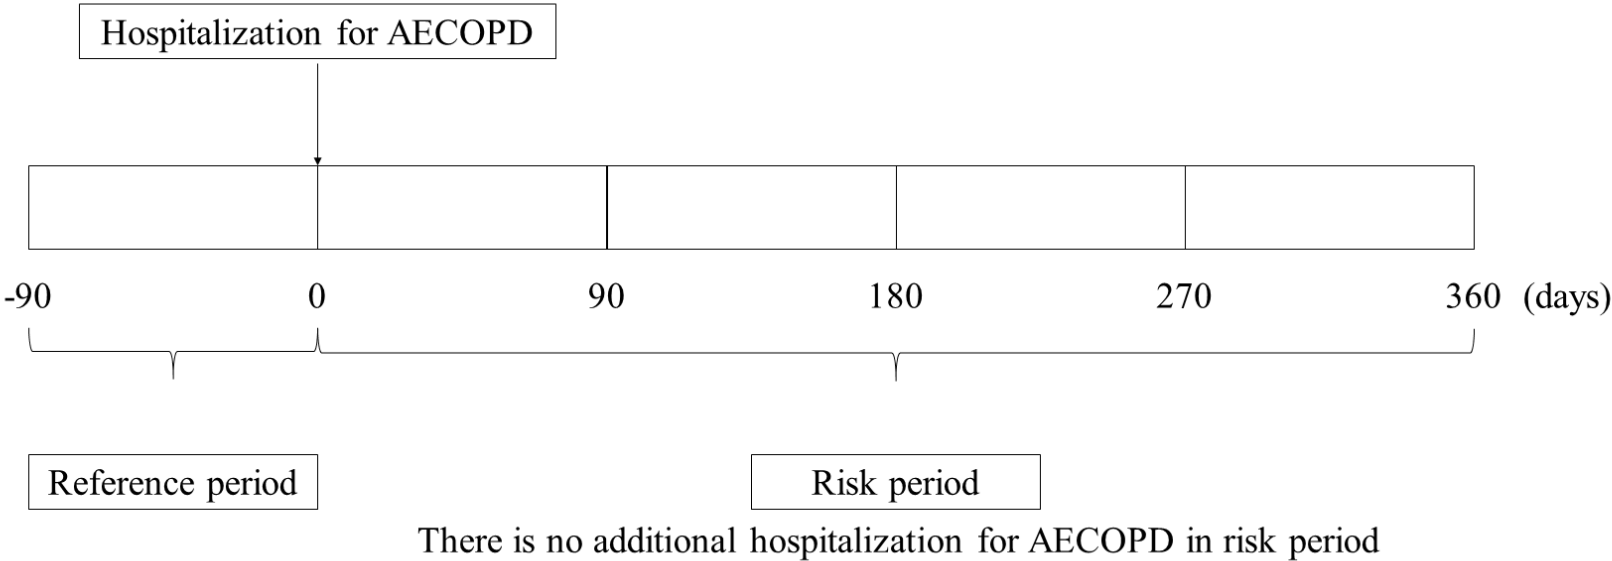

**Supplemental Table 1. Rate ratios of emergency department visit or hospitalization for atrial fibrillation in patients hospitalized for acute exacerbation of chronic obstructive pulmonary disease, stratified by age**

| Days from the index hospitalization | Number of outcome events | Rate (per 100 person-months) | Rate ratio* (95%CI) | P value |
|-------------------------------------|--------------------------|------------------------------|---------------------|---------|
| <b>Aged 40-64 years (n=178)</b>     |                          |                              |                     |         |
| Pre-AECOPD period                   |                          |                              |                     |         |
| -1 to -90 days                      | 40                       | 7.5                          | 1 (reference)       | -       |
| Post-AECOPD period                  |                          |                              |                     |         |
| 1 to 90 days                        | 60                       | 11.2                         | 1.50 (1.01-2.24)    | 0.04    |
| 91 to 180 days                      | 53                       | 9.9                          | 1.33 (0.88-2.00)    | 0.18    |
| 181 to 270 days                     | 50                       | 9.4                          | 1.25 (0.82-1.89)    | 0.29    |
| 271 to 360 days                     | 57                       | 10.7                         | 1.43 (0.95-2.13)    | 0.09    |
| <b>Aged ≥65 years (n=766)</b>       |                          |                              |                     |         |
| Pre-AECOPD period                   |                          |                              |                     |         |
| -1 to -90 days                      | 167                      | 7.3                          | 1 (reference)       | -       |
| Post-AECOPD period                  |                          |                              |                     |         |
| 1 to 90 days                        | 340                      | 14.8                         | 2.04 (1.69-2.45)    | <0.001  |
| 91 to 180 days                      | 160                      | 7.0                          | 0.96 (0.77-1.19)    | 0.70    |
| 181 to 270 days                     | 123                      | 5.4                          | 0.74 (0.58-0.93)    | 0.01    |
| 271 to 360 days                     | 129                      | 5.6                          | 0.77 (0.61-0.97)    | 0.03    |

Abbreviation: CI, confidence interval

\*Rate ratios were calculated by using conditional Poisson regression models

**Supplemental Table 2. Rate ratios of emergency department visit or hospitalization for atrial fibrillation in patients hospitalized for acute exacerbation of chronic obstructive pulmonary disease, stratified by sex**

| Days from the index hospitalization | Number of outcome events | Rate (per 100 person-months) | Rate ratio* (95%CI) | P value |
|-------------------------------------|--------------------------|------------------------------|---------------------|---------|
| <b>Men (n=384)</b>                  |                          |                              |                     |         |
| Pre-AECOPD period                   |                          |                              |                     |         |
| -1 to -90 days                      | 89                       | 7.7                          | 1 (reference)       | -       |
| Post-AECOPD period                  |                          |                              |                     |         |
| 1 to 90 days                        | 143                      | 12.4                         | 1.61 (1.23-2.09)    | <0.001  |
| 91 to 180 days                      | 88                       | 7.6                          | 0.99 (0.74-1.33)    | 0.94    |
| 181 to 270 days                     | 85                       | 7.4                          | 0.96 (0.71-1.29)    | 0.76    |
| 271 to 360 days                     | 86                       | 7.5                          | 0.97 (0.72-1.30)    | 0.82    |
| <b>Women (n=560)</b>                |                          |                              |                     |         |
| Pre-AECOPD period                   |                          |                              |                     |         |
| -1 to -90 days                      | 118                      | 7.0                          | 1 (reference)       | -       |
| Post-AECOPD period                  |                          |                              |                     |         |
| 1 to 90 days                        | 257                      | 15.3                         | 2.18 (1.75-2.71)    | <0.001  |
| 91 to 180 days                      | 125                      | 7.4                          | 1.06 (0.82-1.36)    | 0.65    |
| 181 to 270 days                     | 88                       | 5.2                          | 0.75 (0.57-0.98)    | 0.04    |
| 271 to 360 days                     | 100                      | 6.0                          | 0.85 (0.65-1.11)    | 0.22    |

Abbreviation: CI, confidence interval

\*Rate ratios were calculated by using conditional Poisson regression models

**Supplemental Table 3. Rate ratios of emergency department visit or hospitalization for atrial fibrillation in patients hospitalized for acute exacerbation of chronic obstructive pulmonary disease, stratified by presence of atrial fibrillation at the index hospitalization**

| Days from the index hospitalization        | Number of<br>outcome events | Rate<br>(per 100 person-months) | Rate ratio*<br>(95%CI) | P value |
|--------------------------------------------|-----------------------------|---------------------------------|------------------------|---------|
| <b>With atrial fibrillation (n=685)</b>    |                             |                                 |                        |         |
| Pre-AECOPD period                          |                             |                                 |                        |         |
| -1 to -90 days                             | 165                         | 8.0                             | 1 (reference)          | -       |
| Post-AECOPD period                         |                             |                                 |                        |         |
| 1 to 90 days                               | 297                         | 14.5                            | 1.80 (1.49-2.18)       | <0.001  |
| 91 to 180 days                             | 147                         | 7.2                             | 0.89 (0.71-1.11)       | 0.31    |
| 181 to 270 days                            | 119                         | 5.8                             | 0.72 (0.57-0.91)       | 0.01    |
| 271 to 360 days                            | 138                         | 6.7                             | 0.84 (0.67-1.05)       | 0.12    |
| <b>Without atrial fibrillation (n=259)</b> |                             |                                 |                        |         |
| Pre-AECOPD period                          |                             |                                 |                        |         |
| -1 to -90 days                             | 42                          | 5.4                             | 1 (reference)          | -       |
| Post-AECOPD period                         |                             |                                 |                        |         |
| 1 to 90 days                               | 103                         | 13.3                            | 2.45 (1.71-3.51)       | <0.001  |
| 91 to 180 days                             | 66                          | 8.5                             | 1.57 (1.07-2.31)       | 0.02    |
| 181 to 270 days                            | 54                          | 6.9                             | 1.29 (0.86-1.92)       | 0.22    |
| 271 to 360 days                            | 48                          | 6.2                             | 1.14 (0.76-1.73)       | 0.53    |

Abbreviations: AECOPD, acute exacerbation of chronic obstructive pulmonary disease; CI, confidence interval

\*Rate ratios were calculated by using conditional Poisson regression models

**Supplemental Table 4. Rate ratios of emergency department visit or hospitalization for atrial fibrillation in patients hospitalized for acute exacerbation of chronic obstructive pulmonary disease, stratified by season of index hospitalization**

| Days from the index hospitalization | March-May (n=170)          |                              |                     |         | June-August (n=100)       |                              |                     |         |
|-------------------------------------|----------------------------|------------------------------|---------------------|---------|---------------------------|------------------------------|---------------------|---------|
|                                     | Number of outcome events   | Rate (per 100 person-months) | Rate ratio* (95%CI) | P value | Number of outcome events  | Rate (per 100 person-months) | Rate ratio* (95%CI) | P value |
| Pre-AECOPD period                   |                            |                              |                     |         |                           |                              |                     |         |
| -1 to -90 days                      | 41                         | 8.0                          | 1 (reference)       | -       | 21                        | 7.0                          | 1 (reference)       | -       |
| Post-AECOPD period                  |                            |                              |                     |         |                           |                              |                     |         |
| 1 to 90 days                        | 64                         | 12.5                         | 1.56 (1.05-2.31)    | 0.03    | 41                        | 13.7                         | 1.95 (1.15-3.30)    | 0.01    |
| 91 to 180 days                      | 43                         | 8.4                          | 1.05 (0.68-1.61)    | 0.83    | 23                        | 7.7                          | 1.10 (0.61-1.98)    | 0.76    |
| 181 to 270 days                     | 24                         | 4.7                          | 0.59 (0.35-0.97)    | 0.04    | 13                        | 4.3                          | 0.62 (0.31-1.24)    | 0.17    |
| 271 to 360 days                     | 42                         | 8.2                          | 1.02 (0.67-1.58)    | 0.91    | 23                        | 7.7                          | 1.10 (0.61-1.98)    | 0.76    |
| Days from the index hospitalization | September-November (n=105) |                              |                     |         | December-February (n=206) |                              |                     |         |
|                                     | Number of outcome events   | Rate (per 100 person-months) | Rate ratio* (95%CI) | P value | Number of outcome events  | Rate (per 100 person-months) | Rate ratio* (95%CI) | P value |
| Pre-AECOPD period                   |                            |                              |                     |         |                           |                              |                     |         |
| -1 to -90 days                      | 22                         | 7.0                          | 1 (reference)       | -       | 41                        | 6.6                          | 1 (reference)       | -       |
| Post-AECOPD period                  |                            |                              |                     |         |                           |                              |                     |         |
| 1 to 90 days                        | 45                         | 14.3                         | 2.05 (1.23-3.41)    | 0.01    | 105                       | 17.0                         | 2.56 (1.79-3.67)    | <0.001  |
| 91 to 180 days                      | 29                         | 9.2                          | 1.32 (0.76-2.29)    | 0.33    | 40                        | 6.5                          | 0.98 (0.63-1.51)    | 0.91    |
| 181 to 270 days                     | 20                         | 6.3                          | 0.91 (0.50-1.67)    | 0.76    | 42                        | 6.8                          | 1.02 (0.67-1.58)    | 0.91    |
| 271 to 360 days                     | 15                         | 4.8                          | 0.68 (0.35-1.31)    | 0.25    | 44                        | 7.1                          | 1.07 (0.70-1.64)    | 0.75    |



Abbreviation: CI, confidence interval

Missing information on admission month in 363 patients

\*Rate ratios were calculated by using conditional Poisson regression models

**Supplemental Table 5. Rate ratios of emergency department visit or hospitalization for atrial fibrillation in patients hospitalized for acute exacerbation of chronic obstructive pulmonary disease, including those with primary diagnosis of heart failure and secondary diagnosis of atrial fibrillation (n=1,062)**

| Days from the index hospitalization | Number of<br>outcome events | Rate<br>(per 100 person-months) | Rate ratio*<br>(95%CI) | P value |
|-------------------------------------|-----------------------------|---------------------------------|------------------------|---------|
| Pre-AECOPD period                   |                             |                                 |                        |         |
| -1 to -90 days                      | 239                         | 7.5                             | 1 (reference)          | -       |
| Post-AECOPD period                  |                             |                                 |                        |         |
| 1 to 90 days                        | 454                         | 14.2                            | 1.90 (1.62-2.22)       | <0.001  |
| 91 to 180 days                      | 242                         | 7.6                             | 1.01 (0.85-1.21)       | 0.89    |
| 181 to 270 days                     | 191                         | 6.0                             | 0.80 (0.66-0.97)       | 0.02    |
| 271 to 360 days                     | 206                         | 6.5                             | 0.86 (0.72-1.04)       | 0.12    |

Abbreviations: AECOPD, acute exacerbation of chronic obstructive pulmonary disease; CI, confidence interval

\*Rate ratios were calculated by using conditional Poisson regression models

**Supplemental Table 6. Rate ratios of emergency department visit or hospitalization for atrial fibrillation in patients hospitalized for acute exacerbation of chronic obstructive pulmonary disease (AECOPD), excluding those who had emergency department visit for AECOPD within 90 days preceding hospitalization (n=936)**

| Days from the index hospitalization | Number of outcome events | Rate (per 100 person-months) | Rate ratio* (95% CI) | P value |
|-------------------------------------|--------------------------|------------------------------|----------------------|---------|
| Pre-AECOPD period                   |                          |                              |                      |         |
| -1 to -90 days                      | 206                      | 7.3                          | 1 (reference)        | -       |
| Post-AECOPD period                  |                          |                              |                      |         |
| 1 to 90 days                        | 397                      | 14.1                         | 1.93 (1.63-2.28)     | <0.001  |
| 91 to 180 days                      | 212                      | 7.5                          | 1.03 (0.85-1.25)     | 0.77    |
| 181 to 270 days                     | 173                      | 6.2                          | 0.84 (0.69-1.03)     | 0.09    |
| 271 to 360 days                     | 183                      | 6.5                          | 0.89 (0.73-1.08)     | 0.24    |

Abbreviation: CI, confidence interval

\*Rate ratios were calculated by using conditional Poisson regression models

**Supplemental Table 7. Rate ratios of emergency department visit or hospitalization for atrial fibrillation in patients hospitalized for acute exacerbation of chronic obstructive pulmonary disease, including those with multiple hospitalizations for acute exacerbation of chronic obstructive pulmonary disease during the follow-up period (n=1,547)**

| Days from the index hospitalization | Number of<br>outcome events | Rate<br>(per 100 person-months) | Rate ratio*<br>(95%CI) | P value |
|-------------------------------------|-----------------------------|---------------------------------|------------------------|---------|
| Pre-AECOPD period                   |                             |                                 |                        |         |
| -1 to -90 days                      | 284                         | 6.1                             | 1 (reference)          | -       |
| Post-AECOPD period                  |                             |                                 |                        |         |
| 1 to 90 days                        | 659                         | 14.2                            | 2.32 (2.02-2.67)       | <0.001  |
| 91 to 180 days                      | 412                         | 8.9                             | 1.45 (1.25-1.69)       | <0.001  |
| 181 to 270 days                     | 321                         | 6.9                             | 1.13 (0.96-1.33)       | 0.13    |
| 271 to 360 days                     | 324                         | 7.0                             | 1.14 (0.97-1.34)       | 0.11    |

Abbreviations: AECOPD, acute exacerbation of chronic obstructive pulmonary disease; CI, confidence interval

\*Rate ratios were calculated by using conditional Poisson regression models

**Supplemental Table 8. Rate ratios of emergency department visit or hospitalization for atrial fibrillation in patients hospitalized for acute exacerbation of chronic obstructive pulmonary disease among those who are known to live at least 360 days after index hospitalization (n=602)**

| Days from the index hospitalization | Number of outcome events | Rate (per 100 person-months) | Rate ratio* (95% CI) | P value |
|-------------------------------------|--------------------------|------------------------------|----------------------|---------|
| Pre-AECOPD period                   |                          |                              |                      |         |
| -1 to -90 days                      | 120                      | 6.6                          | 1 (reference)        | -       |
| Post-AECOPD period                  |                          |                              |                      |         |
| 1 to 90 days                        | 232                      | 12.8                         | 1.93 (1.55-2.41)     | <0.001  |
| 91 to 180 days                      | 145                      | 8.0                          | 1.21 (0.95-1.54)     | 0.13    |
| 181 to 270 days                     | 130                      | 7.2                          | 1.08 (0.85-1.39)     | 0.53    |
| 271 to 360 days                     | 155                      | 8.6                          | 1.29 (1.02-1.64)     | 0.04    |

Abbreviation: CI, confidence interval

\*Rate ratios were calculated by using conditional Poisson regression models

**Supplemental Table 9. Odds ratios of emergency department visit or hospitalization for atrial fibrillation in patients hospitalized for acute exacerbation of chronic obstructive pulmonary disease (n=944)**

| Days from the index hospitalization | Patients with outcome event | Outcome event rate, % | Odds ratio* (95% CI) | P value |
|-------------------------------------|-----------------------------|-----------------------|----------------------|---------|
| Pre-AECOPD period                   |                             |                       |                      |         |
| -1 to -90 days                      | 185                         | 19.6                  | 1 (reference)        | -       |
| Post-AECOPD period                  |                             |                       |                      |         |
| 1 to 90 days                        | 362                         | 38.4                  | 2.55 (2.07-3.14)     | <0.001  |
| 91 to 180 days                      | 193                         | 20.4                  | 1.05 (0.84-1.32)     | 0.65    |
| 181 to 270 days                     | 151                         | 16.0                  | 0.78 (0.62-0.99)     | 0.04    |
| 271 to 360 days                     | 166                         | 17.6                  | 0.88 (0.69-1.10)     | 0.26    |

Abbreviation: CI, confidence interval

\*Odds ratios were calculated by using conditional logistic regression models
